# Supplementary material
Source: PubMed Central journal article supplement (PMC4250222)
Supplement: NIHMS624347-supplement-SupFigure_3.pdf [file NIHMS624347-supplement-SupFigure_3.pdf]

**A**

| Control genes | MMS genes |          | Non-MMS Metabolic Genes | Known Mesenchymal Genes |
|---------------|-----------|----------|-------------------------|-------------------------|
| GFP           | AK5       | GPX8     | ACLY                    | CD44                    |
| LacZ          | AKR1B1    | GXYLT2   | AGK                     | CDH1                    |
| LUCIFERASE    | AOX1      | HAS2     | ALDH1L1                 | FOXC2                   |
| RFP           | ARSJ      | HS3ST3A1 | ARG2                    | GCG                     |
|               | B3GNT9    | MGLL     | CDA                     | NT5E                    |
|               | BCAT1     | MGST1    | DIO1                    | SNAI1                   |
|               | CA12      | MICAL2   | ELOVL5                  | SNAI2                   |
|               | CHI3L1    | MME      | GCNT3                   | TGFB1                   |
|               | COX7A1    | MSRB3    | GGH                     | TWIST1                  |
|               | CYBRD1    | NNMT     | GPX3                    | VIM                     |
|               | CYP1B1    | PAM      | HNMT                    | ZEB1                    |
|               | DDAH1     | PAPSS2   | MAOB                    | ZEB2                    |
|               | DPYD      | PDE1C    | NUDT5                   |                         |
|               | DSE       | PLCB4    | ST6GALNAC2              |                         |
|               | DSEL      | PPAP2B   | RRM1*                   |                         |
|               | ENPP2     | PPAPDC1A | TYMS*                   |                         |
|               | EXT1      | PTGR1    |                         |                         |
|               | GALNT10   | SPHK1    |                         |                         |
|               | GBE1      | SULF1    |                         |                         |
|               | GFPT2     | UAP1     |                         |                         |
|               | GLT8D2    | UGCG     |                         |                         |

\* Genes required for proliferation

**B**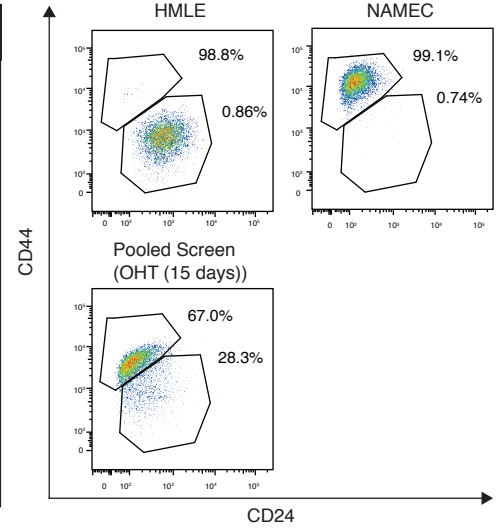**C**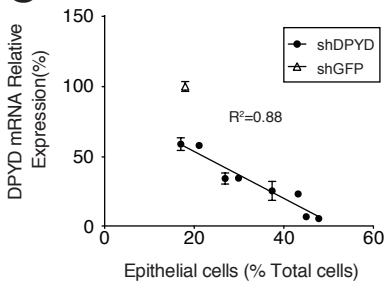**D**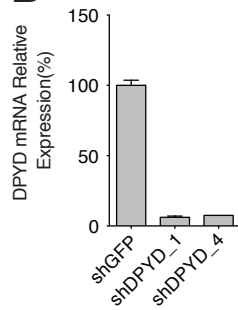**E**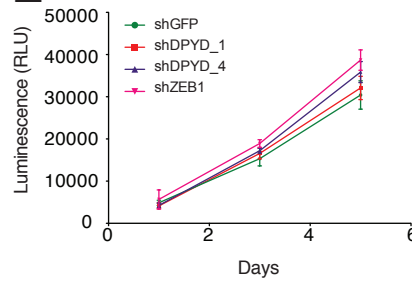**F**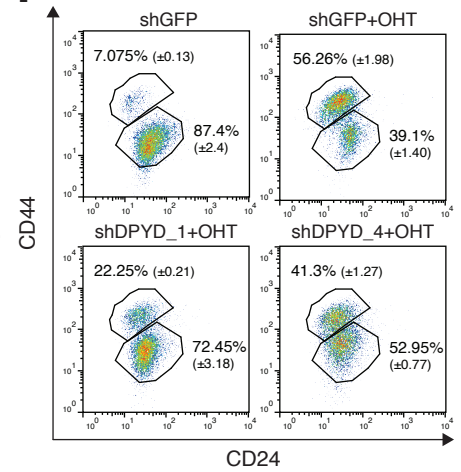**G**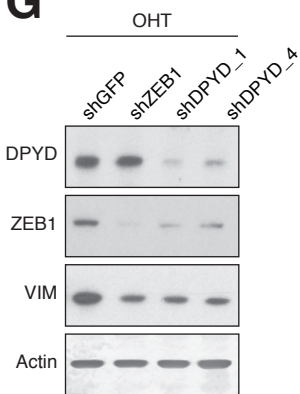**H**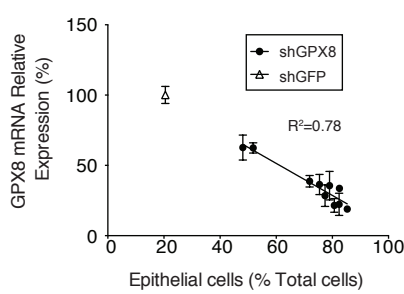

Figure S3
