# Supplementary material
Source: PubMed Central journal article supplement (PMC4250222)

**A**

Mixed Lineage Group Cell Lines By Tumor Type

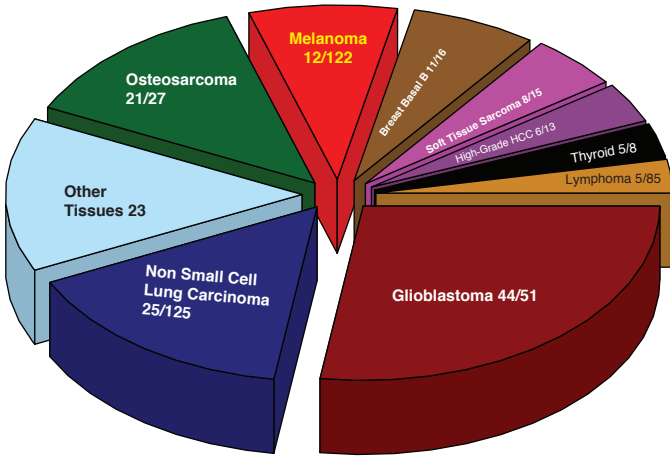**B**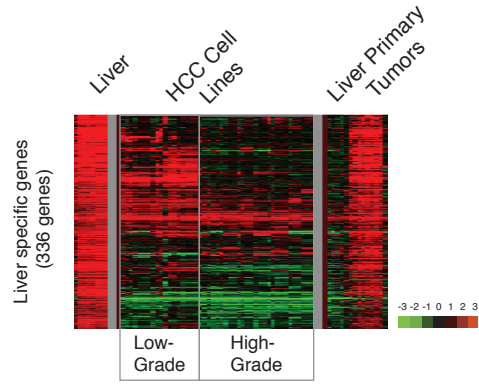**C**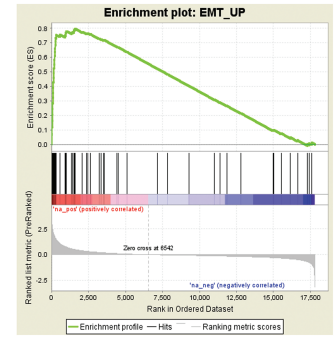

FDR q-value &lt;0.0001

Figure S1

Supplement: NIHMS624347-supplement-SupFigure_1.pdf [file NIHMS624347-supplement-SupFigure_1.pdf]

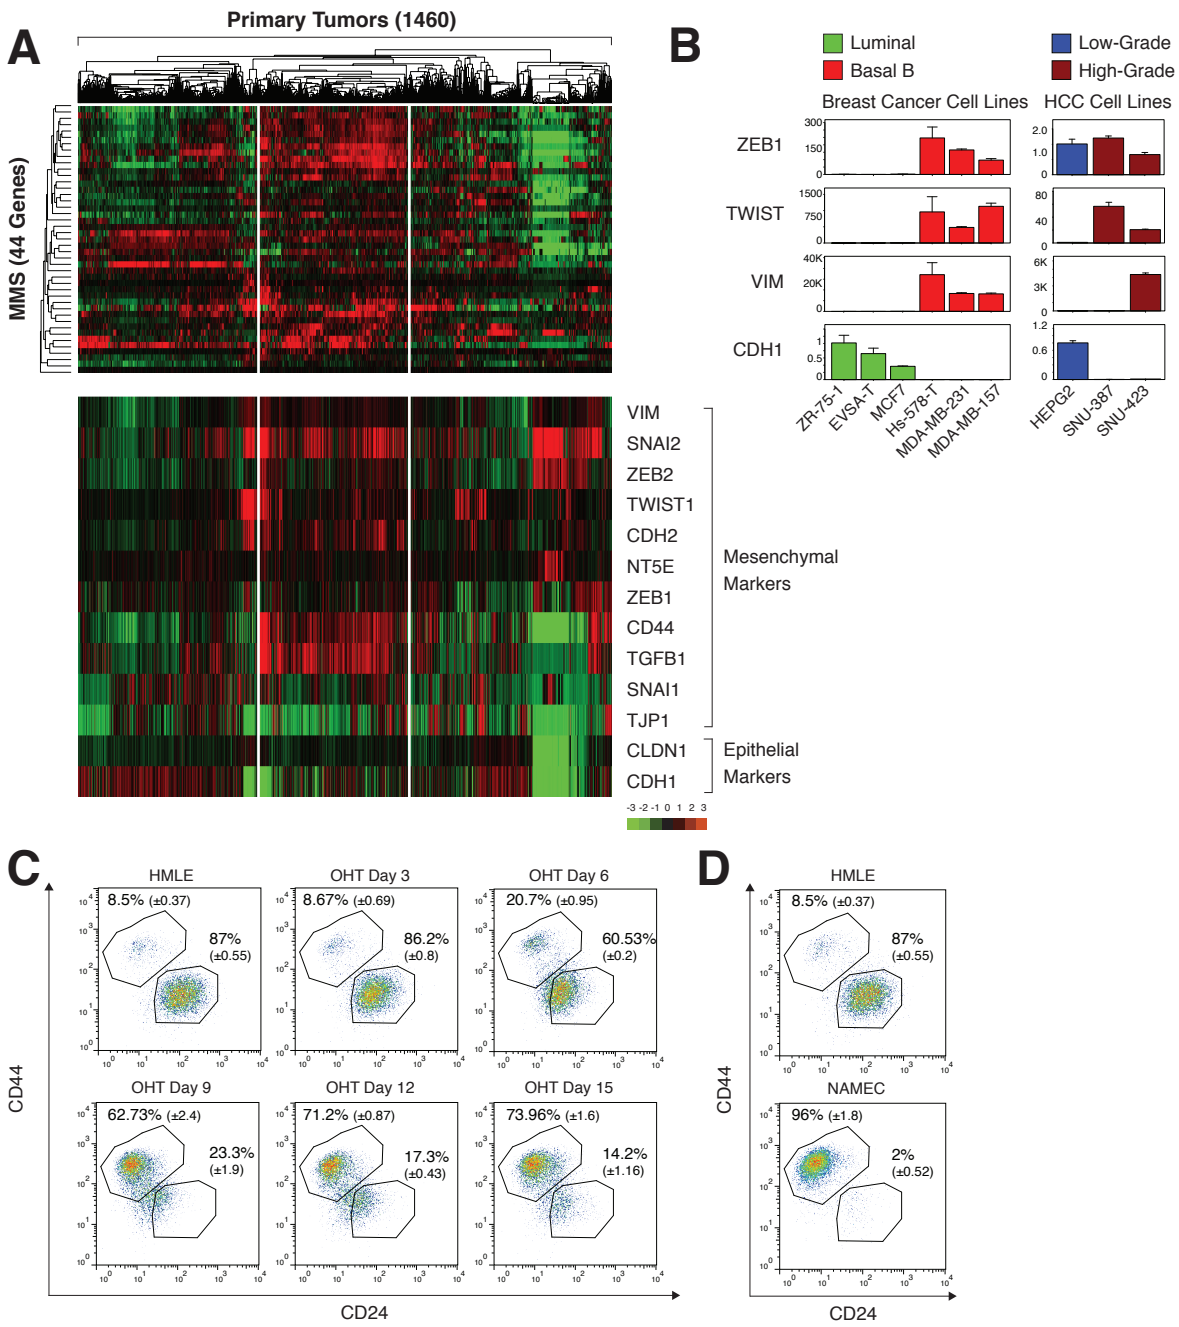

Figure S2

Supplement: NIHMS624347-supplement-SupFigure_2.pdf [file NIHMS624347-supplement-SupFigure_2.pdf]

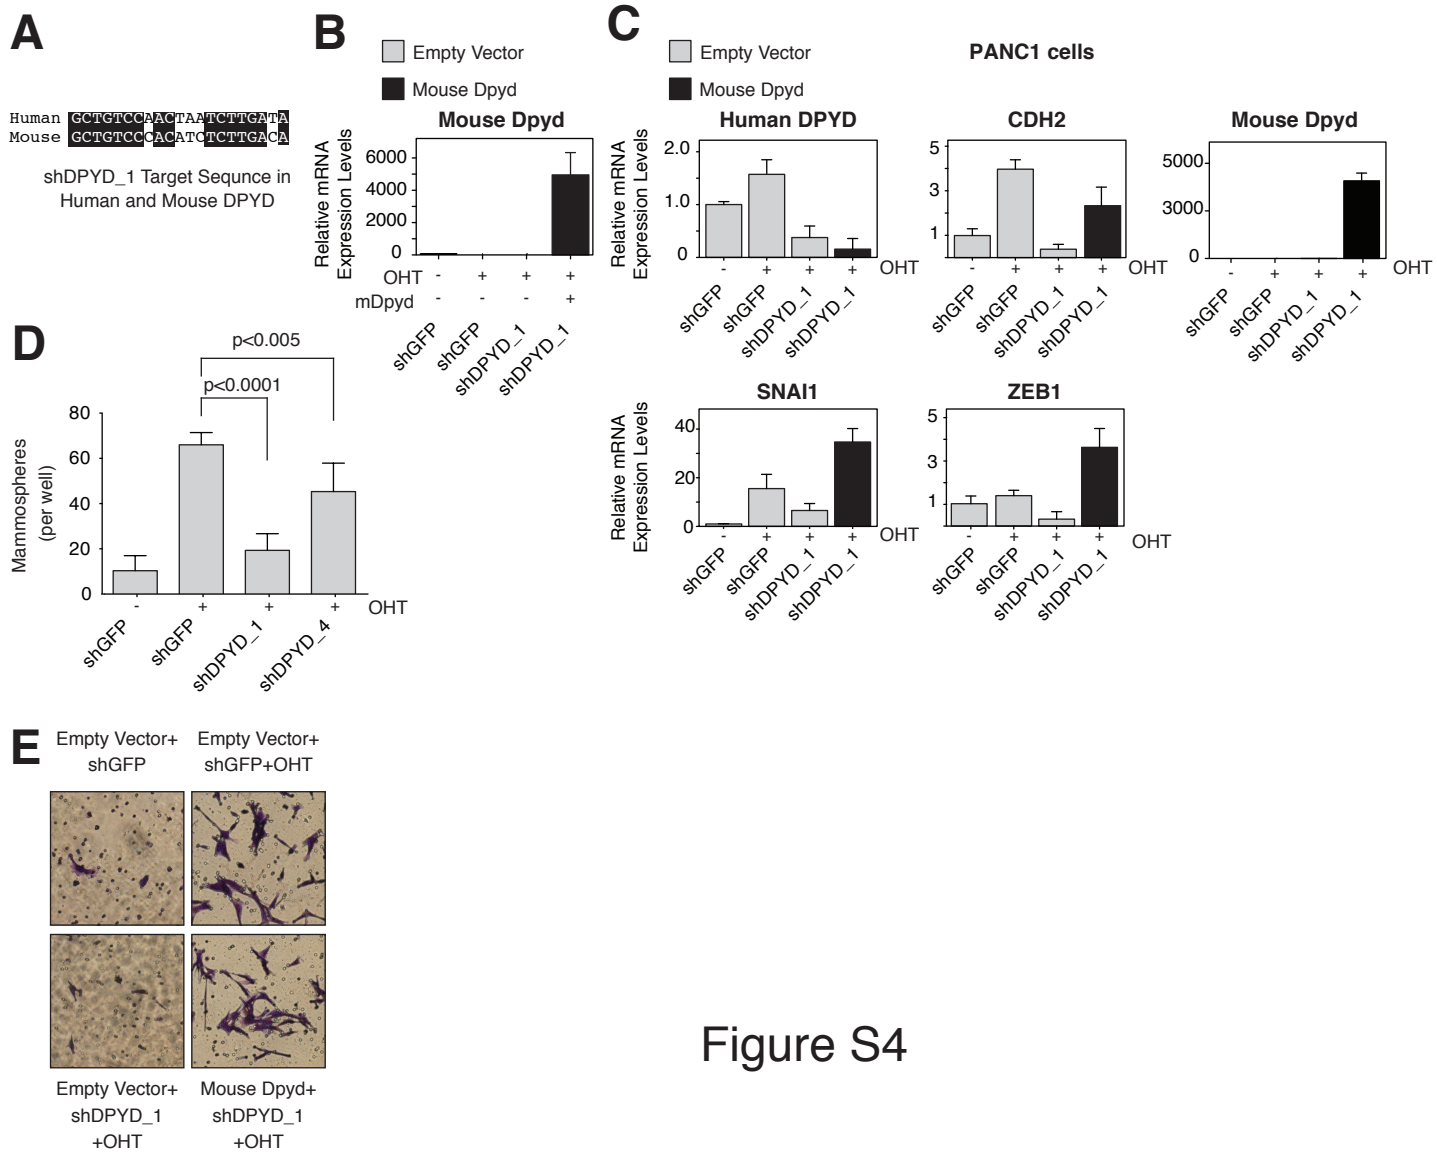

Figure S4

Supplement: NIHMS624347-supplement-SupFigure_4.pdf [file NIHMS624347-supplement-SupFigure_4.pdf]

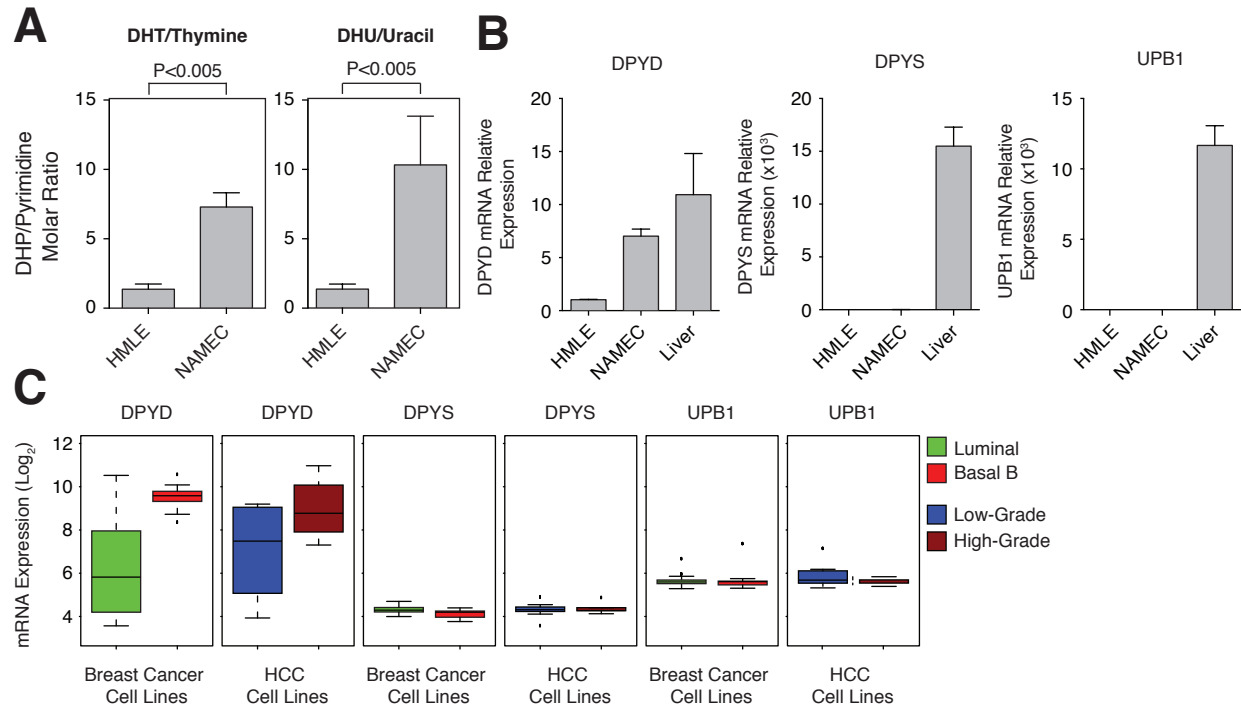

Figure S5

Supplement: NIHMS624347-supplement-SupFigure_5.pdf [file NIHMS624347-supplement-SupFigure_5.pdf]

**A**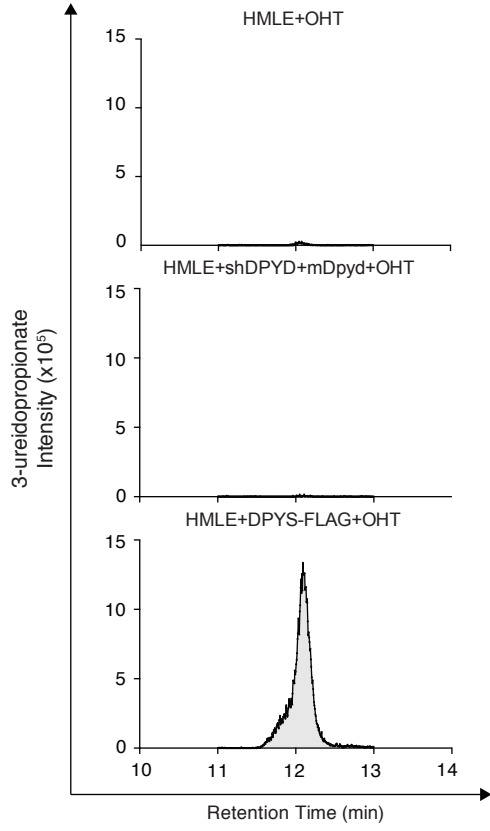**B**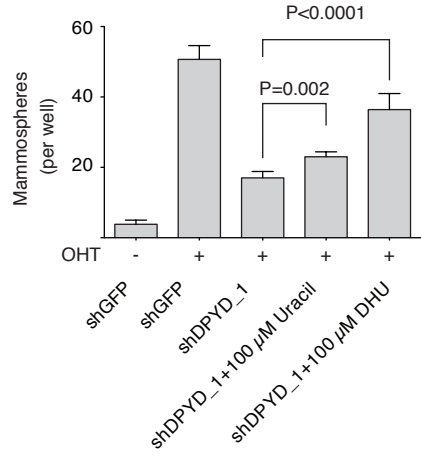**C**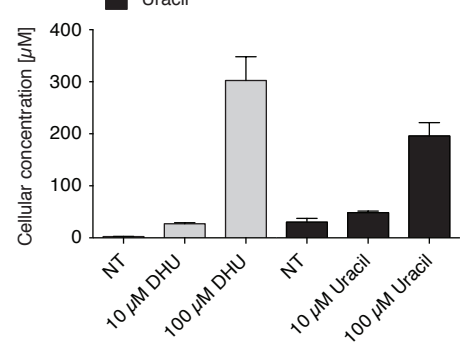

Figure S6

Supplement: NIHMS624347-supplement-SupFigure_6.pdf [file NIHMS624347-supplement-SupFigure_6.pdf]
